# Supplementary material
Source: publisher figshare collection journal article supplement (https://gsapubs.figshare.com/ndownloader/files/22399182)
Supplement: Supplementary file 1 [file 22399182]

## **SUPPLEMENTAL MATERIAL**

### **CEMENTED LAYERS AND GRAIN-DENSITY INTERPOLATION**

The section from 130 to 136 mbsf in the AND1-B core is presented as an example how carbonate cement concentrated in thin micritic beds is expressed in the physical properties (Fig. S 1). The cemented intervals are visible in core images by their brighter color. Four cemented intervals (1 to 4 in Fig. S 1) can be identified in the example, of which only 1 is a distinct micritic layer, whereas 2 and 3 are more nodular and 4 is nodular to layered. Carbonate cement leads to a strong increase in velocity, significant to weak increase and decrease in WBD and FP, respectively. Electrical conduction, expressed as sensor response (Niessen et al., 2007), is decreased except for intervals with nodular cement (Fig. S 1). A strong effect of cement on porosity (almost complete reduction of voids) is only notable in the micritic layer at 132.3 mbsf. Such layers are quantitatively rare in the entire core although a detailed analysis of cemented layers of AND-1B in terms of physical properties has not yet been carried out. The section from 130 to 136 mbsf can also be used to demonstrate the result of the grain-density interpolation (Fig. S 1). Since the lithology varies on a higher level of resolution than data points of grain densities from discrete samples are available (approximately one per meter core, Fig. S1), not all changes in lithology are covered by data points based on measured grain density. The approach of grain-density interpolation (Fig. S1), as described under METHODS of the paper, simulates differences in grain densities in different lithologies very well. This does not include cemented layers because so far no numerical record of cement as part of the lithology is available for the AND-1B core. As cemented layers are not well represented by grain-density samples the exact porosities of these layers remain undetermined.

### **ALGORITHMS USED TO EXPRESS AND CALCULATE NORMAL CONSOLIDATION FOR VOID RATIOS AS A FUNCTION OF EFFECTIVE STRESS**

22 The trends of normal consolidation for different lithologies as presented in Figure 9 (functions A to E) are calculated as described below.

23

#### 24 **Effective Stress**

25

26 For functions A (diatom ooze), C (pelagic clay) and D (terrigenous sediments), WBD were calculated using regression equations given in Hamilton  
27 (1976) valid to depths (d) of 500 mbsf, 300 mbsf and 1000 mbsf, respectively.

28 A:  $WBD = 1.240 + 0.757 (d) - 0.685 (d^2)$ ;

29 C:  $WBD = 1.357 + 1.338 (d) - 0.248 (d^2)$ ;

30 D:  $WBD = 1.53 + 1.395 (d) - 0.617 (d^2)$ .

31 Effective stress was then calculated after equation (4) to (6) with  $\rho_i$  as WBD above and  $\rho_w$  as assumed constant with  $1.03 \text{ gcm}^{-3}$ .

32 For function B (diatom ooze) effective stress is given by Bryant and Rack (1990) for 13 data points to 3,000 kPa. The linear trend from 400 kPa to  
33 3,000 kPa was extrapolated to 4,500 kPa.

34

#### 35 **Void Ratios**

36 For functions A (diatom ooze), C (pelagic clay) and D (terrigenous sediments), FP were calculated using regression equations given in Hamilton  
37 (1976) valid to depths (d) of 500 mbsf, 300 mbsf and 1,000 mbsf, respectively.

38 A:  $FP = 0.861 - 0.549 (d) + 0.492 (d^2)$ ;

39 C:  $WBD = 0.814 - 0.813 (d) - 0.164 (d^2)$ ;

40 D:  $WBD = 0.72 - 0.8165 (d) + 0.361 (d^2)$ .

41 Void ratios were then calculated after equation (3). For function B (diatom ooze) void ratios are given by Bryant and Rack (1990) for 13 data points  
42 to 1.8. The linear trend from 3.5 to 1.8 was extrapolated to 1.22. For function E (diamicton) it is assumed that that initial void ratio of 1 at a stress

level of 10 kPa is reduced to void ratio of 0.4 at an effective stress of  $10^5$  kPa.

#### **Hypothetical Void Ratios of AND-1B for normal consolidation**

For the plots of void ratios versus effective stress of different lithologies (B, C, D, E) regressions were determined using Kaleidagraph™ (Synergy Software). The regression for trend A was not used because trends A and B are nearly similar below a stress level of 200 kPa where most of the AND-1B data were determined. For functions B, C and D best fits were achieved by 5th order polynomials with the general term:

$$VR = t + u \cdot ES + w \cdot ES^2 + x \cdot ES^3 + y \cdot ES^4 + z \cdot ES^5,$$

with VR = Void Ratio and ES = Effective Stress. The constants t, u, w, x, y and z as well as the correlation coefficients R for functions B, C, and D are summarized in Table S1. For the assumed normal consolidation of diamictites (E) the regression is a log function:

$$VR = 1.1951 - 0.2 \log(ES), \text{ with } R=0.99992$$

From the effective stress of AND-1B sediments hypothetical void ratios were calculated according to different lithology. Regression B was used for diatomites. Regression C was used for mudstones to a depth of 200 mbsf (equivalent to 1,664 kPa). Below 200 mbsf regression D was used to calculate hypothetical void ratios of mud stones because both regressions merge at about 1,650 kPa. Hypothetical void ratios of other lithologies (mostly sandstones) and diamictites were calculated using regressions D and E, respectively. The advantage of this approach is that hypothetical void ratios are calculated for different stress levels and not as a function of depth below sea floor. This accounts for the individual field consolidation of the different lithologies at the AND-1B site. Thus the hypothetical and measured AND-1B void ratios are better comparable to other sites around Antarctica, where the lithologies are more uniform and the field consolidation is different from that of AND-1B.

#### **COMPARISON OF AND-1B DIATOMITE FRACTIONAL POROSITIES WITH DATA FROM DIATOMACEOUS INTERVALS IN OTHER MARINE SEDIMENT CORES (REFERENCE DATA)**

64

65 Fractional porosity records of sediment cores from various drill sites around Antarctica and in the Southern Ocean, including the second ANDRILL  
66 core AND-2A, were compiled to serve as reference data sets for assessing porosity features of the AND-1B diatomites (Fig. S2, Table S2). These  
67 collected data provide a good coverage of depositional features in terms of distance from the Antarctic continent and therefore degree of influence  
68 of the ice sheet as well as in terms of geologic time intervals ranging from the Holocene back to the Upper Cretaceous. The reference data from the  
69 Southern Ocean are complemented by reference curves for different types of deep-sea sediments as presented by Hamilton (1976). The reference  
70 curve for diatom ooze is a composite curve of cores from the DSDP sites 19-188 and 19-192 in the Bering Sea. Screen descriptions of smear slides  
71 indicate siliceous contents of 65-95 % (screen descriptions from <http://www.ngdc.noaa.gov/mgg/geology/dsdp/data/>). AND-1B diatomite intervals  
72 are characterized by a signature of systematically lower fractional porosities compared to the majority of the reference data (Fig. S2). This is partly  
73 compromised by a large scatter in the reference porosities in the upper 150 m, where values are observed that are even lower than that of the  
74 Hamilton reference curve for terrigenous sediment and pelagic clay. The scatter is related to the broad coverage of subtle variations within the  
75 overall lithologic composition of “diatomaceous sediments” ranging from “diatom ooze” to “muddy diatom ooze” and “terrigenous detritus rich  
76 diatom ooze” (Tab. S2). However, from about 200 mbsf most of the reference data follow the Hamilton reference curve for deep-sea diatomaceous  
77 ooze quite closely, whereas AND-1B porosities are offset from the reference curve towards lower values by about 0.1. AND-1B diatomite intervals  
78 are thus relatively over-compacted compared to the majority of the reference data. As described in the discussion of the paper vertical loading of ice  
79 sheets during glacial periods account for most of the porosity differences between the AND-1B diatomites and the reference data. Some differences  
80 however are also the result of different conditions of field consolidation in the reference data. At the same depth interval a sequence consisting  
81 entirely of diatomaceous ooze is less consolidated as diatomites of AND-1B, which are intercalated with and overlain by heavier diamictites. In this  
82 sense, and as expressed in the paper, the AND-1B core is unique and can only be compared with reference data from other cores if the porosity is  
83 expressed as a function of effective stress.

84

## REFERENCES CITED

- Barker, P.F., Camerlenghi, A., Acton, G.D., et al., eds., 1999, Proceedings of the Ocean Drilling Program, Initial Reports, v. 178, College Station, TX (Ocean Drilling Program).
- Barker, P.E, Kennett, J.P., et al., eds., 1988, Proceedings of the Ocean Drilling Program, Initial Reports, v. 113: College Station, TX (Ocean Drilling Program), p 5–11. doi:10.2973/odp.proc.ir.113.102.
- Barron, J., Larsen, B., et al., eds., 1989, Proceedings of the Ocean Drilling Program, Initial Reports , v. 119, College Station, TX (Ocean Drilling Program).
- Barrett, P.J., Carter, L., Dunbar, G.B., Dunker, E., Giorgetti, G., Harper, M.A., McKay, R.M., Niessen, F., Nixdorf, U., Pyne, A.R., Riesselmann, C., Robinson, N., Hollis , C., and Strong, P., 2005, Oceanography and sedimentation beneath the McMurdo Ice Shelf in Windless Bight, Antarctica: Antarctic Data Series 25, Research Centre, Victoria University of Wellington, 100 p.
- Bryant, W.R., and Rack, F.R., 1990, Consolidation characteristics of Weddell Sea sediments: results of ODP Leg 113, *in* Barker, P.F., Kennett, J.P., et al., eds.: Proceedings of the Ocean Drilling Program Scientific Results, v. 113, College Station, TX (Ocean Drilling Program), p. 211–223.
- Hamilton, E.L., 1976, Variations of density and porosity with depth in deep-sea sediments: Journal of Sedimentary Petrology, v. 46, p. 280-300.
- Niessen, F., Magens, D., Gebhardt, A.C. and the ANDRILL-MIS Science Team, 2007, Physical Properties of the AND-1B Core, ANDRILL McMurdo Ice Shelf Project, Antarctica: Terra Antarctica, v. 14, no. 3, p. 155-166.
- Schlich, R., Wise, S.W., Jr., et al., eds., 1989, Proceedings of the Ocean Drilling Program, Initial Reports, v. 120, College Station, TX (Ocean Drilling Program).

## Figure captions

Figure S1. AND-1B detailed physical properties log 130 to 136 mbsf. Vp and Resistivity (electrical conduction, sensor response) from Niessen et al. (2007). Lithology after Krissek et al. (2007). Core images from weblink [coreref.org/projects/and1-1b/viewer/130](http://coreref.org/projects/and1-1b/viewer/130). Density (WBD), grain density (GD) and fractional proosity (FP) this study. Dots in the plot of grain density are data from discrete samples. The line interpolates GD to the same vertical resolution as physical properties are measured on whole core (dots in the other plots) as described in text. For data in red boxes core images

111 are shown. Layers with carbonate cement are highlighted in yellow and labeled 1 to 4.

112

113 Figure S2. AND-1B fractional porosities of DU-II to DU-XIII (see Fig. 6 for details) in comparison with reference porosity data from diatomaceous

114 intervals in DSDP and ODP sediment cores from the Southern Ocean (for detailed information on reference data see Table S2, for locations see

115 Figure 1). Reference porosities were calculated from GRAPE measurements using equation (2). Reference curves for diatomaceous ooze, pelagic

116 clay and terrigenous sediment from Hamilton (1976).

117

118

TABLE S1. CONSTANTS OF REGRESSION B, C, D SHOWN IN FIGURE 8  
R = CORRELATION COEFFICIENT

| Regression |             |            |             |  |
|------------|-------------|------------|-------------|--|
| Constant   | B           | C          | D           |  |
| t          | 5.17        | 4.3445     | 2.3798      |  |
| u          | -0.0038175  | -0.0065453 | -0.0011579  |  |
| w          | 2.2374e-06  | 8.3914e-06 | 3.1612e-07  |  |
| x          | -6.9572e-10 | -7.243e-09 | -4.4536e-11 |  |
| y          | 9.822e-14   | 3.4339e-12 | 3.03e-15    |  |
| z          | -4.7642e-18 | -6.643e-16 | 7.8387e-20  |  |
| R          | 0.99914     | 1          | 0.99896     |  |

TABLE S2. REFERENCE POROSITY DATA, SORTED BY RELATIVE DISTANCE TO THE ANTARCTIC CONTINENT

| Drilling program / project | Leg + Site / core number | Latitude (°) | Longitude (°) | Water depth (m) | Age range                   | Lithology name from core description                    | Relative distance to Antarctic continent* | Porosity data reference source | Reference core description                                                                                                                      |
|----------------------------|--------------------------|--------------|---------------|-----------------|-----------------------------|---------------------------------------------------------|-------------------------------------------|--------------------------------|-------------------------------------------------------------------------------------------------------------------------------------------------|
| DSDP                       | 28-272                   | -77.13       | -176.76       | 619             | Upper Miocene - Mid-Miocene | terrigenous detritus rich (muddy) diatom ooze/diatomite | proximal: shelf                           | ODP data archive***            | <a href="http://www.ngdc.noaa.gov/mgg/geology/dsdp/data/28/272/screen.txt">http://www.ngdc.noaa.gov/mgg/geology/dsdp/data/28/272/screen.txt</a> |
| ODP                        | 178-1098C                | -64.86       | -64.21        | 1010            | Holocene                    | laminated/massive muddy/mud-bearing diatom ooze         | proximal: inner shelf                     | IODP data archive****          | Barker et al. (1999)                                                                                                                            |
| ODP                        | 178-1099A                | -64.95       | -64.32        | 1400            | Holocene                    | laminated/massive (muddy/mud-bearing) diatom ooze       | proximal: inner shelf                     | IODP data archive              | Barker et al. (1999)                                                                                                                            |
| ODP                        | 178-1099B                | -64.95       | -64.32        | 1400            | Holocene                    | laminated/massive (muddy/mud-bearing) diatom ooze       | proximal: inner shelf                     | IODP data archive              | Barker et al. (1999)                                                                                                                            |

|      |           |        |        |      |                              |                                               |                          |                   |                                                                                                                                                 |
|------|-----------|--------|--------|------|------------------------------|-----------------------------------------------|--------------------------|-------------------|-------------------------------------------------------------------------------------------------------------------------------------------------|
| ODP  | 119-740A  | -68.76 | 76.68  | 807  | Quaternary - Upper Pliocene  | diatom ooze                                   | proximal: inner shelf    | IODP data archive | Barron et al. (1989)                                                                                                                            |
| DSDP | 28-268    | -63.95 | 105.16 | 3529 | Upper Pleistocene - Miocene  | (clay mineral rich) diatom ooze               | medial: continental rise | ODP data archive  | <a href="http://www.ngdc.noaa.gov/mgg/geology/dsdp/data/28/268/screen.txt">http://www.ngdc.noaa.gov/mgg/geology/dsdp/data/28/268/screen.txt</a> |
| ODP  | 178-1095B | -66.99 | -78.49 | 3842 | Late Pliocene - Mid-Miocene  | (muddy) diatom ooze, muddy siliceous ooze     | medial: continental rise | IODP data archive | Barker et al. (1999)                                                                                                                            |
| ODP  | 178-1096C | -67.57 | -76.96 | 3153 | Early Pliocene               | muddy diatom ooze                             | medial: continental rise | IODP data archive | Barker et al. (1999)                                                                                                                            |
| DSDP | 28-274    | -69.00 | 173.43 | 3305 | Quaternary - Lower Oligocene | terrigenous detritus rich (muddy) diatom ooze | medial: continental rise | ODP data archive  | <a href="http://www.ngdc.noaa.gov/mgg/geology/dsdp/data/28/274/screen.txt">http://www.ngdc.noaa.gov/mgg/geology/dsdp/data/28/274/screen.txt</a> |

\* open ocean not defined with respect to actual water depth but distance to Antarctic Shelf

\*\* Southern McMurdo Sound Project

\*\*\* <http://www.ngdc.noaa.gov/mgg/geology/dsdp/data>

\*\*\*\* <http://iodp.tamu.edu/janusweb/phsprops/>

For locations (Drilling program and Leg) see Figure 1.

TABLE S2. REFERENCE POROSITY DATA, SORTED BY RELATIVE DISTANCE TO THE ANTARCTIC CONTINENT (continued)

| Drilling program / project | Leg + Site / core number | Latitude (°) | Longitude (°) | Water depth (m) | Age range                               | Lithology name from core description                     | Relative distance to Antarctic continent* | Porosity data reference source | Reference core description |
|----------------------------|--------------------------|--------------|---------------|-----------------|-----------------------------------------|----------------------------------------------------------|-------------------------------------------|--------------------------------|----------------------------|
| ODP                        | 113-689B                 | -64.52       | 3.10          | 2080            | Quaternary/Lower Pliocene - Mid-Miocene | diatom ooze                                              | distal: open ocean                        | IODP data archive              | Barker et al. (1988)       |
| ODP                        | 113-690B                 | -65.16       | 1.20          | 2914            | Quaternary/Upper Pliocene - Mid-Miocene | diatom ooze                                              | distal: open ocean                        | IODP data archive              | Barker et al. (1988)       |
| ODP                        | 113-696B                 | -61.85       | -42.93        | 650             | Upper Miocene - Mid-Miocene             | (silty mud-bearing) diatom ooze, (mud-bearing) diatomite | distal: open ocean                        | IODP data archive              | Barker et al. (1988)       |
| ODP                        | 119-736A                 | -49.40       | 71.66         | 629             | Quaternary - Upper Pliocene             | diatom ooze (with volcanic detritus)                     | distal: open ocean                        | IODP data archive              | Barron et al. (1989)       |



|      |          |        |        |      |                                    |                                                       |                    |                   |                                                                                                                                                 |
|------|----------|--------|--------|------|------------------------------------|-------------------------------------------------------|--------------------|-------------------|-------------------------------------------------------------------------------------------------------------------------------------------------|
| ODP  | 119-736B | -49.40 | 71.66  | 628  | Quaternary                         | diatom ooze (with volcanic detritus)                  | distal: open ocean | IODP data archive | Barron et al. (1989)                                                                                                                            |
| ODP  | 119-736C | -49.40 | 71.66  | 629  | Upper Pliocene                     | diatom ooze                                           | distal: open ocean | IODP data archive | Barron et al. (1989)                                                                                                                            |
| ODP  | 119-737A | -50.23 | 73.03  | 564  | Lower Pliocene - Upper Miocene     | diatom ooze                                           | distal: open ocean | IODP data archive | Barron et al. (1989)                                                                                                                            |
| ODP  | 119-744C | -61.58 | 80.60  | 2308 | Quaternary - Lower Pliocene        | (calcareous) diatom ooze                              | distal: open ocean | IODP data archive | Barron et al. (1989)                                                                                                                            |
| ODP  | 119-745B | -59.60 | 85.85  | 4083 | Quaternary - Lower Pliocene        | (clay) diatom ooze, silty diatomaceous ooze           | distal: open ocean | IODP data archive | Barron et al. (1989)                                                                                                                            |
| ODP  | 120-751A | -57.73 | 79.81  | 1634 | Lower Pleistocene - Lower Pliocene | diatom ooze                                           | distal: open ocean | IODP data archive | Schlich et al. (1989)                                                                                                                           |
| DSDP | 28-265   | -53.54 | 109.95 | 3581 | Pleistocene - Lower Pliocene       | (carbonate/nannofossil/foraminifera rich) diatom ooze | distal: open ocean | ODP data archive  | <a href="http://www.ngdc.noaa.gov/mgg/geology/dsdp/data/28/265/screen.txt">http://www.ngdc.noaa.gov/mgg/geology/dsdp/data/28/265/screen.txt</a> |
| DSDP | 28-266   | -56.40 | 110.11 | 4167 | Upper Pleistocene - Lower Miocene  | (clay mineral rich) diatom ooze                       | distal: open ocean | ODP data archive  | <a href="http://www.ngdc.noaa.gov/mgg/geology/dsdp/data/28/266/screen.txt">http://www.ngdc.noaa.gov/mgg/geology/dsdp/data/28/266/screen.txt</a> |

TABLE S2. REFERENCE POROSITY DATA, SORTED BY RELATIVE DISTANCE TO THE ANTARCTIC CONTINENT (continued)

| Drilling program / project | Leg + Site / core number | Latitude (°) | Longitude (°) | Water depth (m) | Age range                         | Lithology name from core description                | Relative distance to Antarctic continent* | Porosity data reference source | Reference core description                                                                                                                      |
|----------------------------|--------------------------|--------------|---------------|-----------------|-----------------------------------|-----------------------------------------------------|-------------------------------------------|--------------------------------|-------------------------------------------------------------------------------------------------------------------------------------------------|
| DSDP                       | 29-278                   | -56.56       | 160.07        | 3675            | Upper Pleistocene - Lower Miocene | diatom ooze, siliceous ooze                         | distal: open ocean                        | ODP data archive               | <a href="http://www.ngdc.noaa.gov/mgg/geology/dsdp/data/29/278/screen.txt">http://www.ngdc.noaa.gov/mgg/geology/dsdp/data/29/278/screen.txt</a> |
| DSDP                       | 35-323                   | -63.68       | -97.99        | 5004            | Upper Pliocene - Lower Pliocene   | clay mineral rich radiolaria rich muddy diatom ooze | distal: open ocean                        | ODP data archive               | <a href="http://www.ngdc.noaa.gov/mgg/geology/dsdp/data/35/323/screen.txt">http://www.ngdc.noaa.gov/mgg/geology/dsdp/data/35/323/screen.txt</a> |
| DSDP                       | 36-328                   | -49.81       | -36.66        | 5095            | Pleistocene - Upper Eocene        | diatom ooze                                         | distal: open ocean                        | ODP data archive               | <a href="http://www.ngdc.noaa.gov/mgg/geology/dsdp/data/36/328/screen.txt">http://www.ngdc.noaa.gov/mgg/geology/dsdp/data/36/328/screen.txt</a> |

|      |         |        |        |      |                                   |                                                                       |                    |                  |                                                                                                                                                   |
|------|---------|--------|--------|------|-----------------------------------|-----------------------------------------------------------------------|--------------------|------------------|---------------------------------------------------------------------------------------------------------------------------------------------------|
| DSDP | 36-328B | -49.81 | -36.66 | 5095 | Pliocene - Lower Oligocene        | (clay mineral rich) diatom mud                                        | distal: open ocean | ODP data archive | <a href="http://www.ngdc.noaa.gov/mgg/geology/dsdp/data/36/328B/screen.txt">http://www.ngdc.noaa.gov/mgg/geology/dsdp/data/36/328B/screen.txt</a> |
| DSDP | 36-329  | -50.66 | -46.10 | 1519 | Pleistocene - Upper Miocene       | (carbonate/clay mineral rich) diatom ooze, siliceous ooze             | distal: open ocean | ODP data archive | <a href="http://www.ngdc.noaa.gov/mgg/geology/dsdp/data/36/329/screen.txt">http://www.ngdc.noaa.gov/mgg/geology/dsdp/data/36/329/screen.txt</a>   |
| DSDP | 71-511  | -51.00 | -46.97 | 2589 | Quaternary - Upper Eocene         | (carbonate/nannofossil/clay mineral rich) diatom ooze, siliceous ooze | distal: open ocean | ODP data archive | <a href="http://www.ngdc.noaa.gov/mgg/geology/dsdp/data/71/511/screen.txt">http://www.ngdc.noaa.gov/mgg/geology/dsdp/data/71/511/screen.txt</a>   |
| DSDP | 71-512  | -49.87 | -40.85 | 1846 | Pliocene - Mid-Miocene            | (clay mineral rich) diatom mud/ooze                                   | distal: open ocean | ODP data archive | <a href="http://www.ngdc.noaa.gov/mgg/geology/dsdp/data/71/512/screen.txt">http://www.ngdc.noaa.gov/mgg/geology/dsdp/data/71/512/screen.txt</a>   |
| DSDP | 71-513  | -47.58 | -24.64 | 4373 | Pleistocene - Lower Pliocene      | clay mineral rich (muddy) diatom ooze                                 | distal: open ocean | ODP data archive | <a href="http://www.ngdc.noaa.gov/mgg/geology/dsdp/data/71/513/screen.txt">http://www.ngdc.noaa.gov/mgg/geology/dsdp/data/71/513/screen.txt</a>   |
| DSDP | 71-513A | -47.58 | -24.64 | 4373 | Lower Pliocene - Upper Oligocene  | clay mineral rich (muddy) diatom ooze, clay mineral rich diatom mud   | distal: open ocean | ODP data archive | <a href="http://www.ngdc.noaa.gov/mgg/geology/dsdp/data/71/513A/screen.txt">http://www.ngdc.noaa.gov/mgg/geology/dsdp/data/71/513A/screen.txt</a> |
| DSDP | 71-514  | -46.05 | -26.86 | 4318 | Quaternary - Lower Pliocene       | clay mineral rich (muddy) diatom ooze, clay mineral rich diatom mud   | distal: open ocean | ODP data archive | <a href="http://www.ngdc.noaa.gov/mgg/geology/dsdp/data/71/514/screen.txt">http://www.ngdc.noaa.gov/mgg/geology/dsdp/data/71/514/screen.txt</a>   |
| DSDP | 19-188  | 53.75  | 178.66 | 2649 | Upper Pleistocene - Upper Miocene | diatomaceous ooze                                                     | distal: slope      | Hamilton (1976)  | Hamilton (1976)                                                                                                                                   |
| DSDP | 19-192  | 53.01  | 164.71 | 3014 | Upper Miocene - Mid-Miocene       | diatomaceous ooze                                                     | distal: open ocean | Hamilton (1976)  | Hamilton (1976)                                                                                                                                   |

131

132

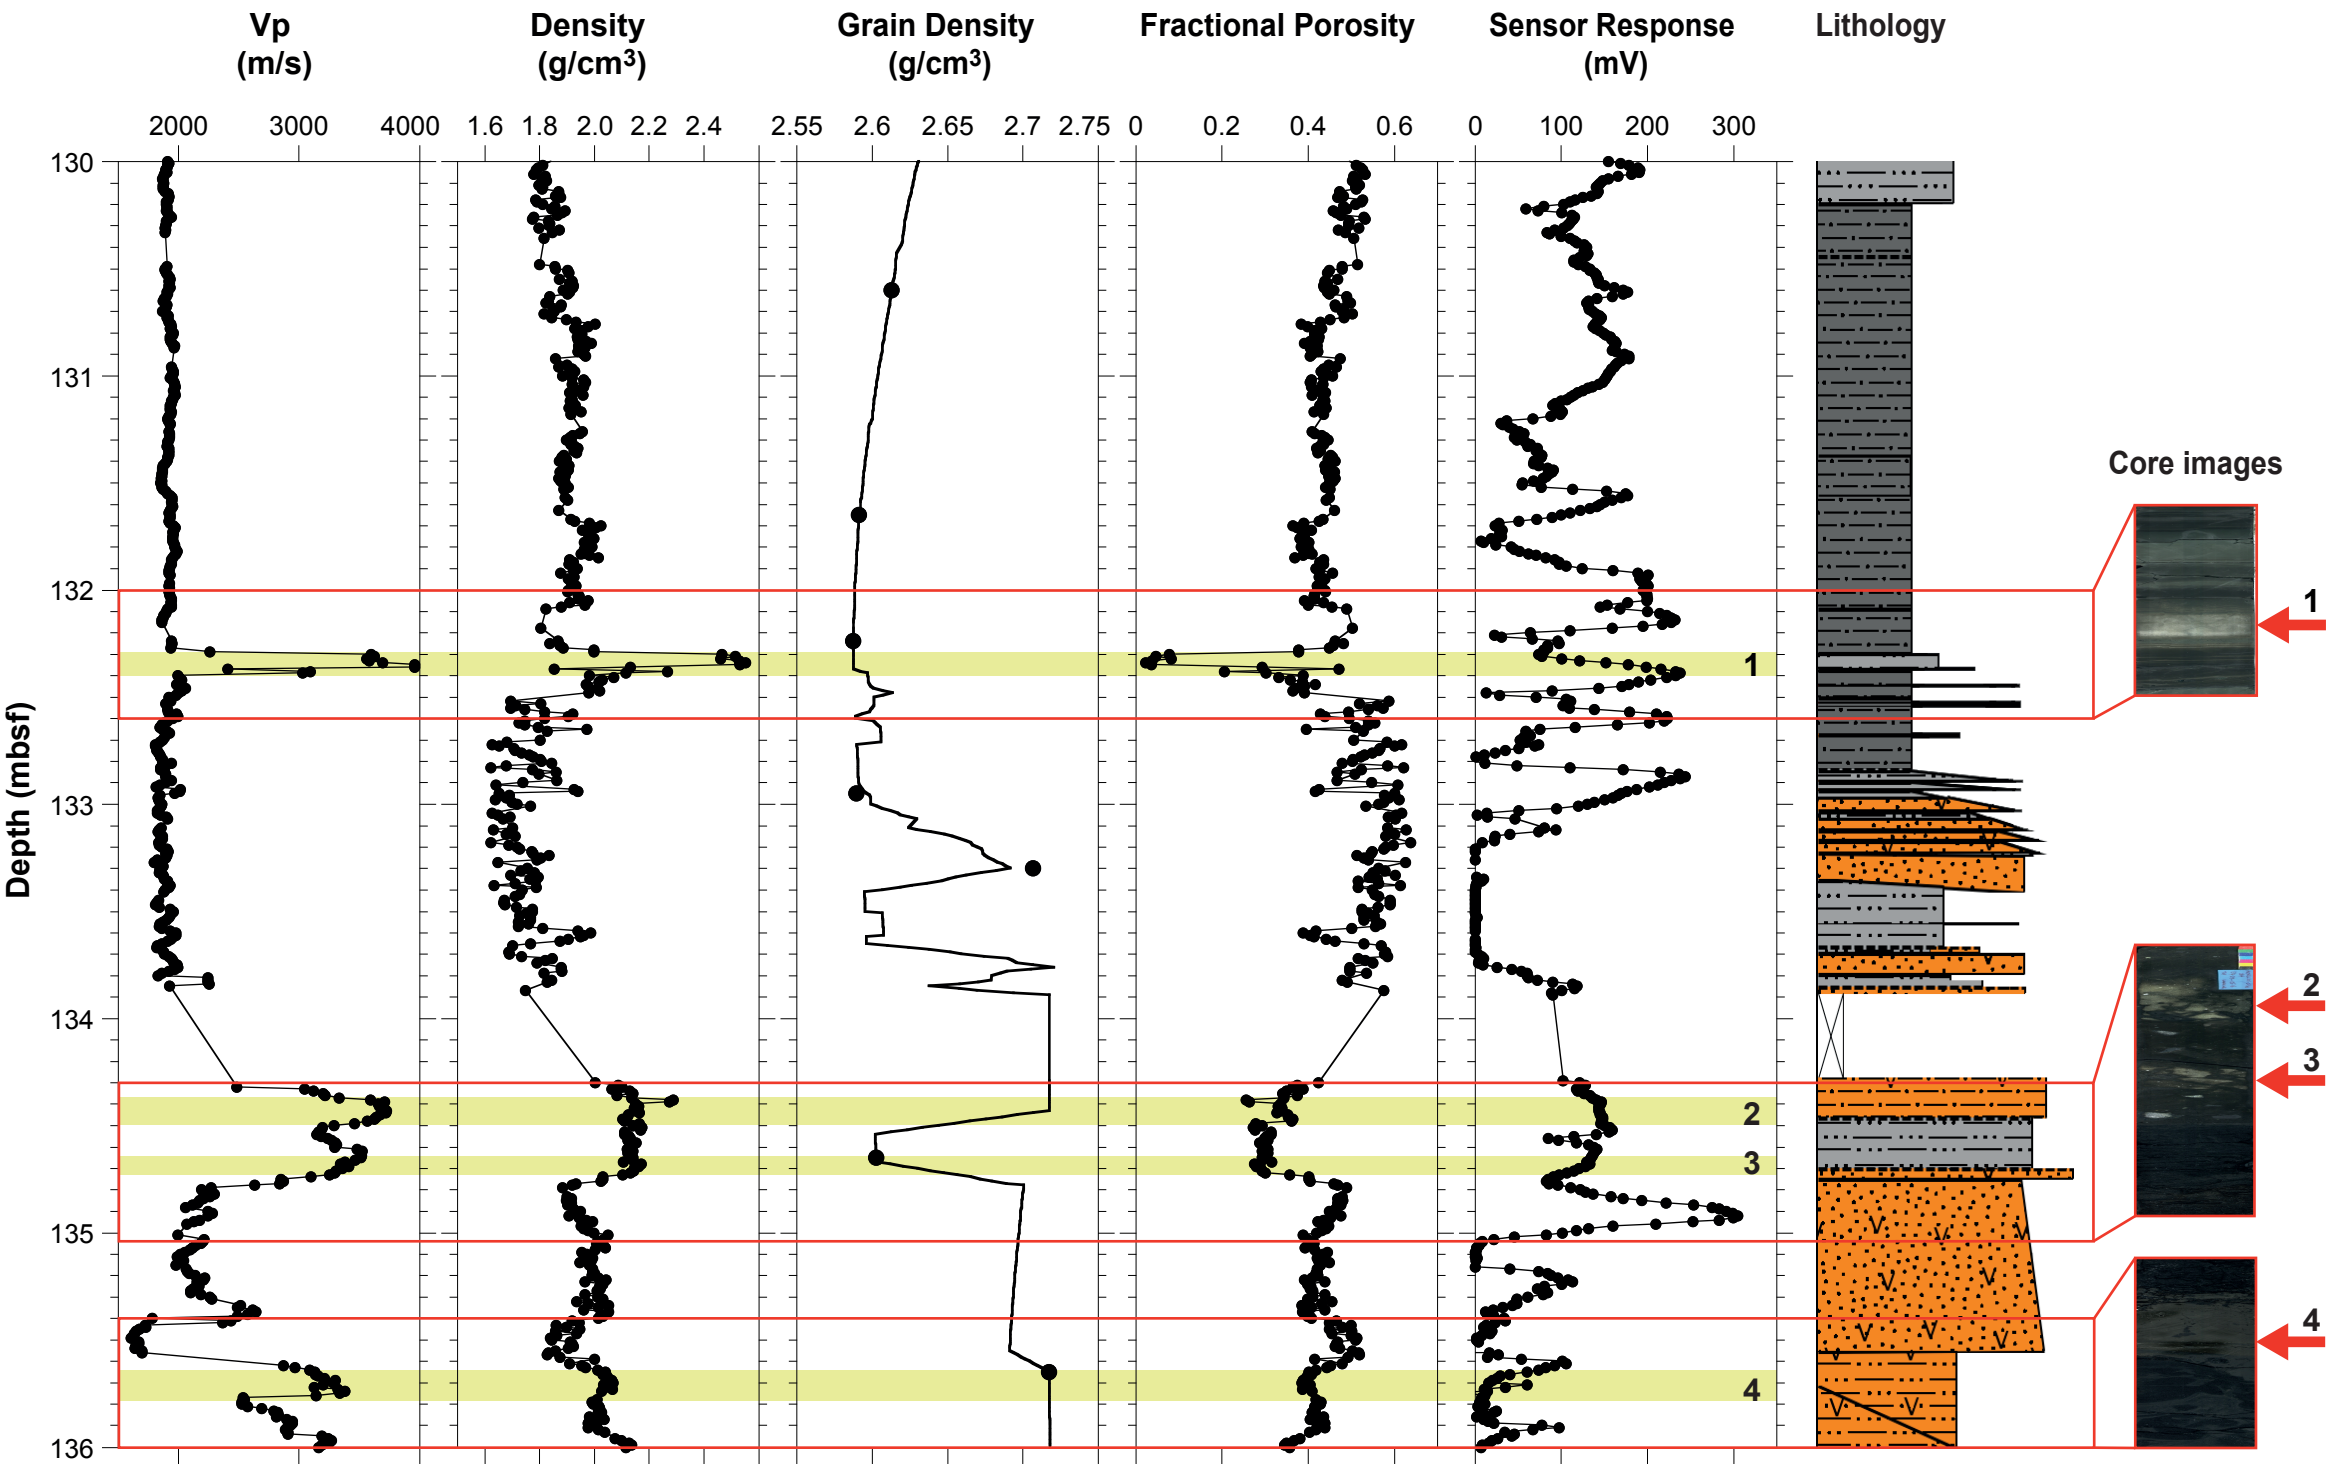

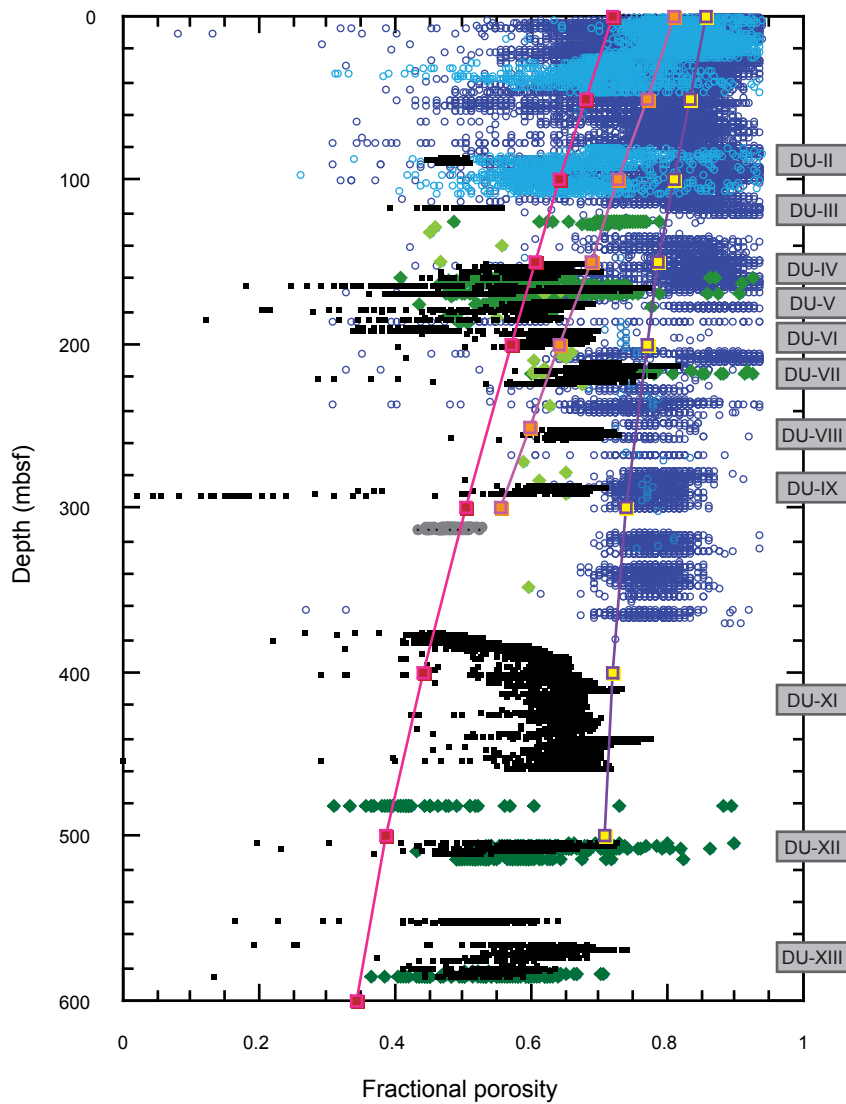

■ AND-1B (ANDRILL-MIS)

Reference data:

○ distal - open ocean:

DSDP 28-265 / -266

DSDP 29-278

DSDP 35-323

DSDP 36-328 / -328B / -329

DSDP 71-511 / -512 / -513 / -513A / -514

ODP 113-689B / -690B / -696B

ODP 119-736A / -736B / -736C /

-737A / -744C / -745B

○ medial - continental rise:

DSDP 28-268 / -274

◆ ODP 178-1096C

◆ ODP 178-1095B

○ proximal - (inner) shelf:

ODP 119-740A

ODP 178-1098C / -1099A / -1099B

◆ DSDP 28-272

● AND-2A (ANDRILL-SMS)

Reference curves Hamilton (1976):

—■— Deep-sea, diatomaceous ooze

—■— Deep-sea, pelagic clay

—■— Deep-sea, terrigenous sediment
